# Supplementary material for: Artificial intelligence for diabetic retinopathy in low-income and middle-income countries: a scoping review
Source: PubMed Central journal article supplement (PMC10401245; doi:10.1136/bmjdrc-2023-003424), 2023-08-02
Supplement: bmjdrc-2023-003424supp002.pdf [file bmjdrc-2023-003424supp002.pdf]

## Publicly available datasets for diabetic retinopathy from low- and middle income countries

|                                                               |                       |
|---------------------------------------------------------------|-----------------------|
| Asia Pacific Teleophthalmology society                        | India                 |
| Retinal Fundus and OCT                                        | Iran                  |
| DR1                                                           | Brazil                |
| DR2                                                           | Brazil                |
| Diabetic Retinopathy Image Database                           | Turkey                |
| Fundus fluorescein angiogram and colour fundus                | Iran                  |
| Fundus images with exudates                                   | Iran                  |
| Indian Diabetic Retinopathy Image Dataset                     | India                 |
| Ocular disease intelligent recognition                        | China                 |
| Canada OCT retinal images                                     | India                 |
| RetinaCheck- Microaneurysm                                    | Netherlands and China |
| RetinaCheck- Scanning Laser ophthalmoscopy Vessel patch       | Netherlands and China |
| RetinaCheck- Scanning Laser ophthalmoscopy Microaneurysm      | Netherlands and China |
| Retinal Optical Coherence Tomography classification challenge | Iran                  |
