# Supplementary material for: Artificial intelligence for diabetic retinopathy in low-income and middle-income countries: a scoping review
Source: PubMed Central journal article supplement (PMC10401245; doi:10.1136/bmjdrc-2023-003424), 2023-08-02
Supplement: bmjdrc-2023-003424supp003.pdf [file bmjdrc-2023-003424supp003.pdf]

**Supplementary table 1: Details of the arbitration process for the externally validated studies included in Table 1 of the main manuscript**

| Study                                    | Details of arbitration process                                                                                                                                                                                                                                                                                                  |
|------------------------------------------|---------------------------------------------------------------------------------------------------------------------------------------------------------------------------------------------------------------------------------------------------------------------------------------------------------------------------------|
| <i>Sosale et al</i> <sup>70</sup>        | 5 persons graded each image with the majority grade considered as the gold standard                                                                                                                                                                                                                                             |
| <i>Bahl et al</i> <sup>71</sup>          | NS                                                                                                                                                                                                                                                                                                                              |
| <i>Natarajan et al</i> <sup>72</sup>     | 2 ophthalmologists graded each image. In case of discrepancy, a VR surgeon made the final decision                                                                                                                                                                                                                              |
| <i>Astha et al</i> <sup>51</sup>         | Any disagreements were arbitrated by a third senior vitreo-retinal surgeon                                                                                                                                                                                                                                                      |
| <i>Ting et al</i> <sup>67</sup>          | NS                                                                                                                                                                                                                                                                                                                              |
| <i>Bellemo et al</i> <sup>53</sup>       | NS                                                                                                                                                                                                                                                                                                                              |
| <i>Ting et al</i> <sup>27</sup>          | Varied between datasets                                                                                                                                                                                                                                                                                                         |
| <i>Sayres et al</i> <sup>73</sup>        | 3 retinal specialists participated in multiple rounds of adjudication until consensus was reached                                                                                                                                                                                                                               |
| <i>Raumviboosuk et al</i> <sup>66</sup>  | When disagreements occurred, graders were able to re-grade images with access to their prior grade and other specialists grade. If agreement was still not reached over 3 rounds of this approach, a senior retina specialist assigned the final grade                                                                          |
| <i>Gulshan et al</i> <sup>74</sup>       | At Aravind all images were adjudicated by a panel of 3 senior retinal specialists who graded images independently with any disagreements discussed until consensus was reached.<br>At Sankara, if all graders agreed on final grade, that was accepted as the ground truth, otherwise the same protocol as at Aravind was used. |
| <i>Gulshan et al</i> <sup>75</sup>       | An image was classified as referable if ≥50% of ophthalmologists graded it referable                                                                                                                                                                                                                                            |
| <i>Bora et al</i> <sup>40</sup>          | NS                                                                                                                                                                                                                                                                                                                              |
| <i>Ruamviboosuk et al</i> <sup>55</sup>  | Any disagreements were reviewed by adjudicators in a round-robin fashion until all panel members agreed.                                                                                                                                                                                                                        |
| <i>Al-Turk et al</i> <sup>76</sup>       | NS                                                                                                                                                                                                                                                                                                                              |
| <i>Al-Turk et al</i> <sup>77</sup>       | NS                                                                                                                                                                                                                                                                                                                              |
| <i>Rajalakshmi et al</i> <sup>78</sup>   | Disagreements adjudicated by a third retinal specialist                                                                                                                                                                                                                                                                         |
| <i>Zhang et al</i> <sup>56</sup>         | Disagreements were reviewed by a senior grader and their decision was taken as final grade                                                                                                                                                                                                                                      |
| <i>Li et al</i> <sup>57</sup>            | N/A (only 1 grader)                                                                                                                                                                                                                                                                                                             |
| <i>Lin et al</i> <sup>25</sup>           | Disagreements resolved by an expert retinal specialist                                                                                                                                                                                                                                                                          |
| <i>Ming et al</i> <sup>79</sup>          | Disagreements were re-graded by a specialist panel                                                                                                                                                                                                                                                                              |
| <i>Pei Xiao Ting et al</i> <sup>80</sup> | Disagreements were adjudicated by a third retinal specialist                                                                                                                                                                                                                                                                    |
| <i>Hao et al</i> <sup>58</sup>           | Disagreements were reviewed by a more senior chief physician who decided the final grade                                                                                                                                                                                                                                        |
| <i>Bawankar et al</i> <sup>81</sup>      | NS                                                                                                                                                                                                                                                                                                                              |
| <i>Hansen et al</i> <sup>82</sup>        | NS                                                                                                                                                                                                                                                                                                                              |
| <i>Dong et al</i> <sup>26</sup>          | Disagreements were reviewed by a third expert who made the final decision                                                                                                                                                                                                                                                       |
| <i>Yang et al</i> <sup>59</sup>          | Disagreements were decided by a third senior grader                                                                                                                                                                                                                                                                             |
| <i>Nunez do Rio et al</i> <sup>52</sup>  | A senior ophthalmologist arbitrated disagreements                                                                                                                                                                                                                                                                               |
| <i>Mathenge et al</i> <sup>18</sup>      | NS                                                                                                                                                                                                                                                                                                                              |
| <i>Li et al</i> <sup>68</sup>            | Disagreements adjudicated by a third senior grader                                                                                                                                                                                                                                                                              |
